# Supplementary material for: Genome-Wide Identification and Expression Patterns of the SWEET Gene Family in Bletilla striata and its Responses to Low Temperature and Oxidative Stress
Source: MDPI journal article supplement (doi:10.3390/ijms231710057), 2022-09-02
Supplement: s1 [file s1]

**Table S1.** Information of *BsSWEET* genes.

| Gene name | Chromosome location | Protein(aa) | MW(Da)    | Theoretical pI | Aliphatic index | GRAVY | Subcellular localization |
|-----------|---------------------|-------------|-----------|----------------|-----------------|-------|--------------------------|
| BsSWEET1  | Chr1                | 262         | 28,718.14 | 9.50           | 107.67          | 0.571 | Plasma membrane          |
| BsSWEET2  | Chr1                | 213         | 23,440.78 | 9.17           | 115.77          | 0.408 | Plasma membrane          |
| BsSWEET3  | Chr2                | 258         | 28,578.46 | 8.70           | 136.59          | 0.938 | Plasma membrane          |
| BsSWEET4  | Chr3                | 237         | 26,845.94 | 8.67           | 118.10          | 0.903 | Plasma membrane          |
| BsSWEET5  | Chr4                | 190         | 21,349.94 | 5.85           | 135.89          | 1.058 | Plasma membrane          |
| BsSWEET6  | Chr4                | 162         | 18,209.80 | 8.52           | 126.85          | 0.610 | Plasma membrane          |
| BsSWEET7  | Chr4                | 261         | 29,873.61 | 9.48           | 114.60          | 0.498 | Plasma membrane          |
| BsSWEET8  | Chr4                | 198         | 22,355.01 | 9.32           | 132.88          | 0.897 | Plasma membrane          |
| BsSWEET9  | Chr4                | 112         | 12,497.44 | 5.47           | 95.00           | 0.521 | Plasma membrane          |
| BsSWEET10 | Chr4                | 250         | 27,479.81 | 9.68           | 129.00          | 0.681 | Plasma membrane          |
| BsSWEET11 | Chr5                | 259         | 28,872.71 | 8.48           | 130.54          | 0.850 | Plasma membrane          |
| BsSWEET12 | Chr5                | 113         | 12,621.89 | 7.82           | 114.69          | 0.347 | Plasma membrane          |
| BsSWEET13 | Chr6                | 142         | 16,132.84 | 8.96           | 152.18          | 1.363 | Plasma membrane          |
| BsSWEET14 | Chr7                | 236         | 26,222.60 | 8.78           | 120.51          | 0.790 | Plasma membrane          |
| BsSWEET15 | Chr7                | 247         | 28,195.57 | 9.01           | 104.09          | 0.527 | Plasma membrane          |
| BsSWEET16 | Chr8                | 299         | 33,984.56 | 9.31           | 116.35          | 0.629 | Plasma membrane          |
| BsSWEET17 | Chr8                | 269         | 29,659.77 | 7.00           | 114.94          | 0.401 | Plasma membrane          |
| BsSWEET18 | Chr9                | 220         | 24,559.24 | 9.18           | 117.45          | 0.828 | Plasma membrane          |
| BsSWEET19 | Chr10               | 176         | 19,896.92 | 9.75           | 132.33          | 0.757 | Plasma membrane          |
| BsSWEET20 | Chr11               | 258         | 29,125.70 | 9.42           | 110.74          | 0.436 | Plasma membrane          |
| BsSWEET21 | Chr11               | 269         | 30,202.80 | 7.66           | 120.37          | 0.694 | Plasma membrane          |
| BsSWEET22 | CTG2248             | 241         | 27,957.82 | 9.63           | 122.45          | 0.572 | Plasma membrane          |
| BsSWEET23 | CTG4490             | 258         | 28,586.48 | 8.70           | 132.44          | 0.903 | Plasma membrane          |

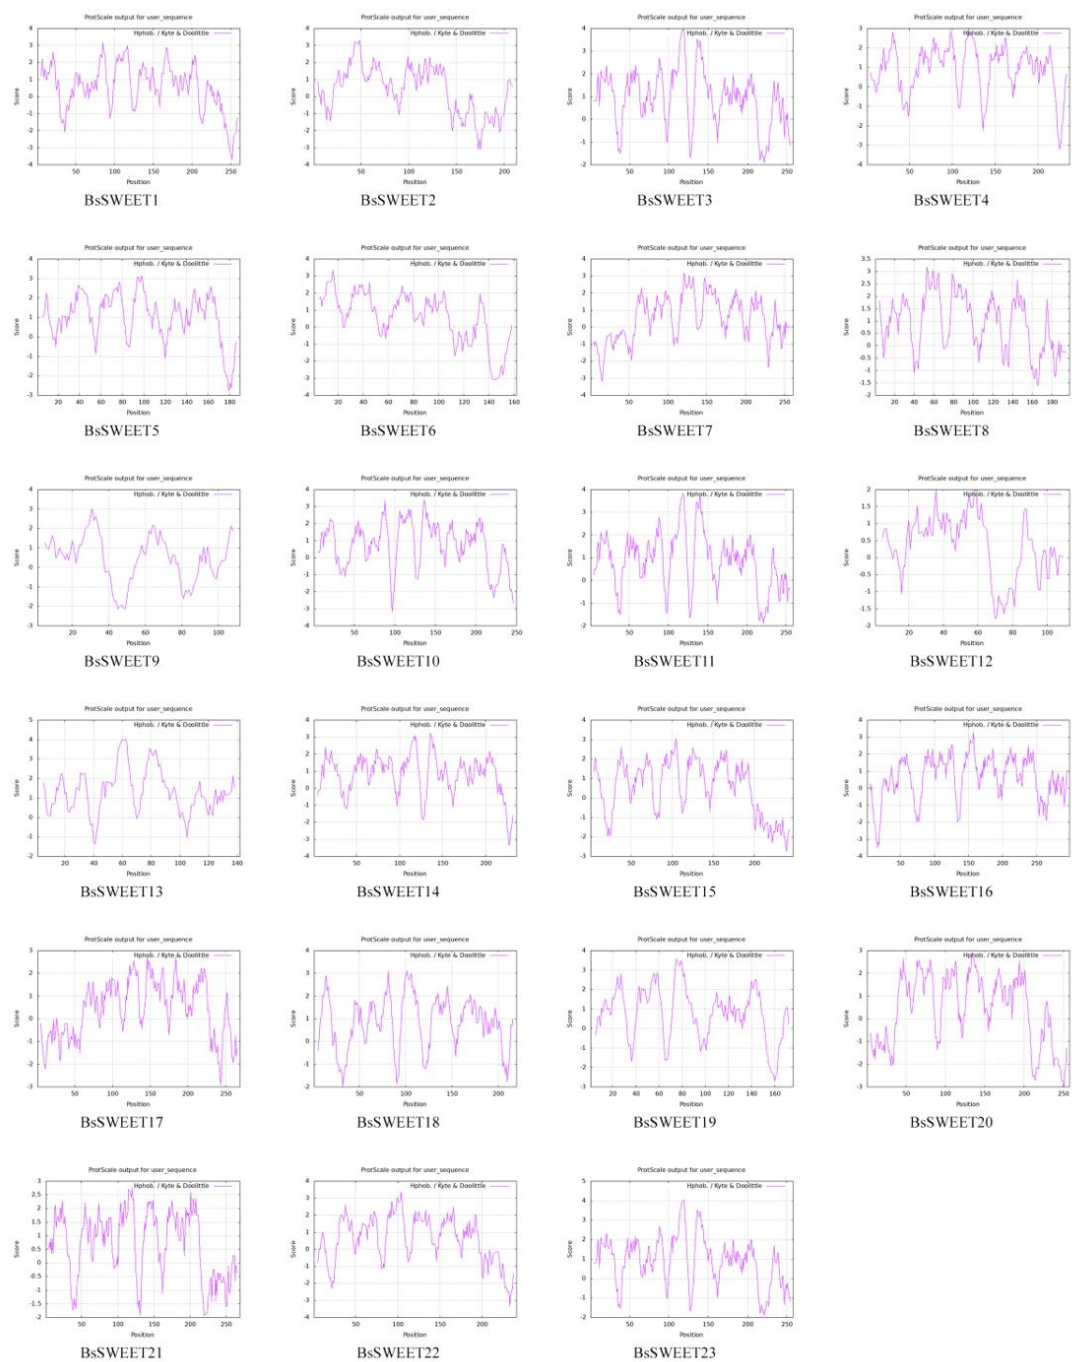

**Figure S1.** Prediction of hydrophobicity of BsWEET proteins.

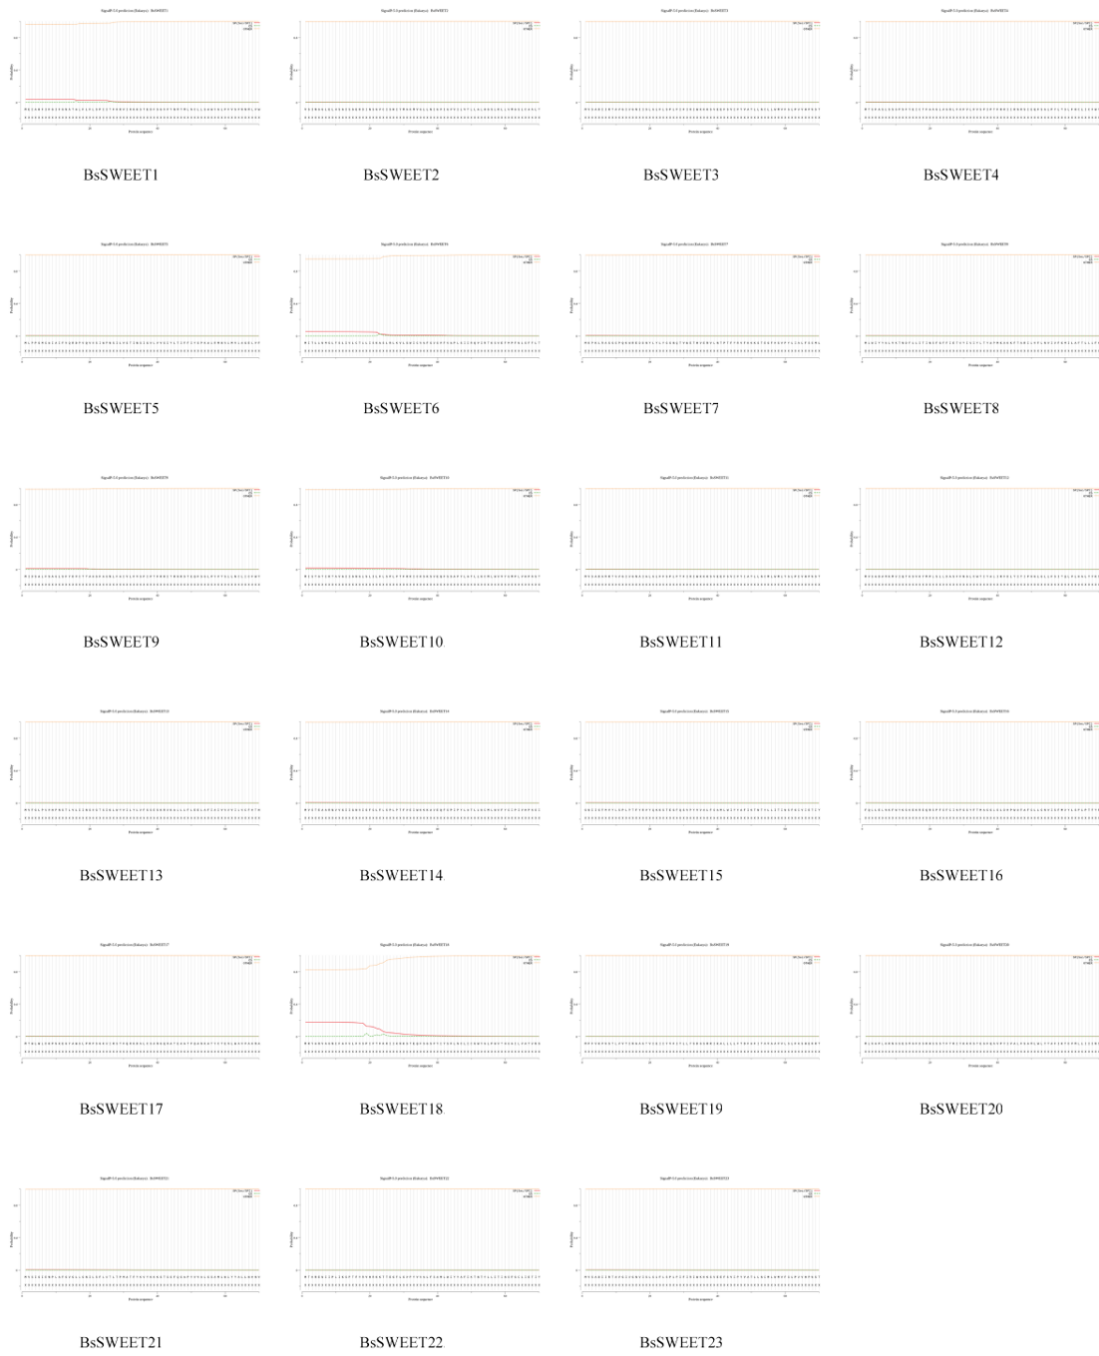

**Figure S2.** Prediction of signal peptides of BsWEET proteins.

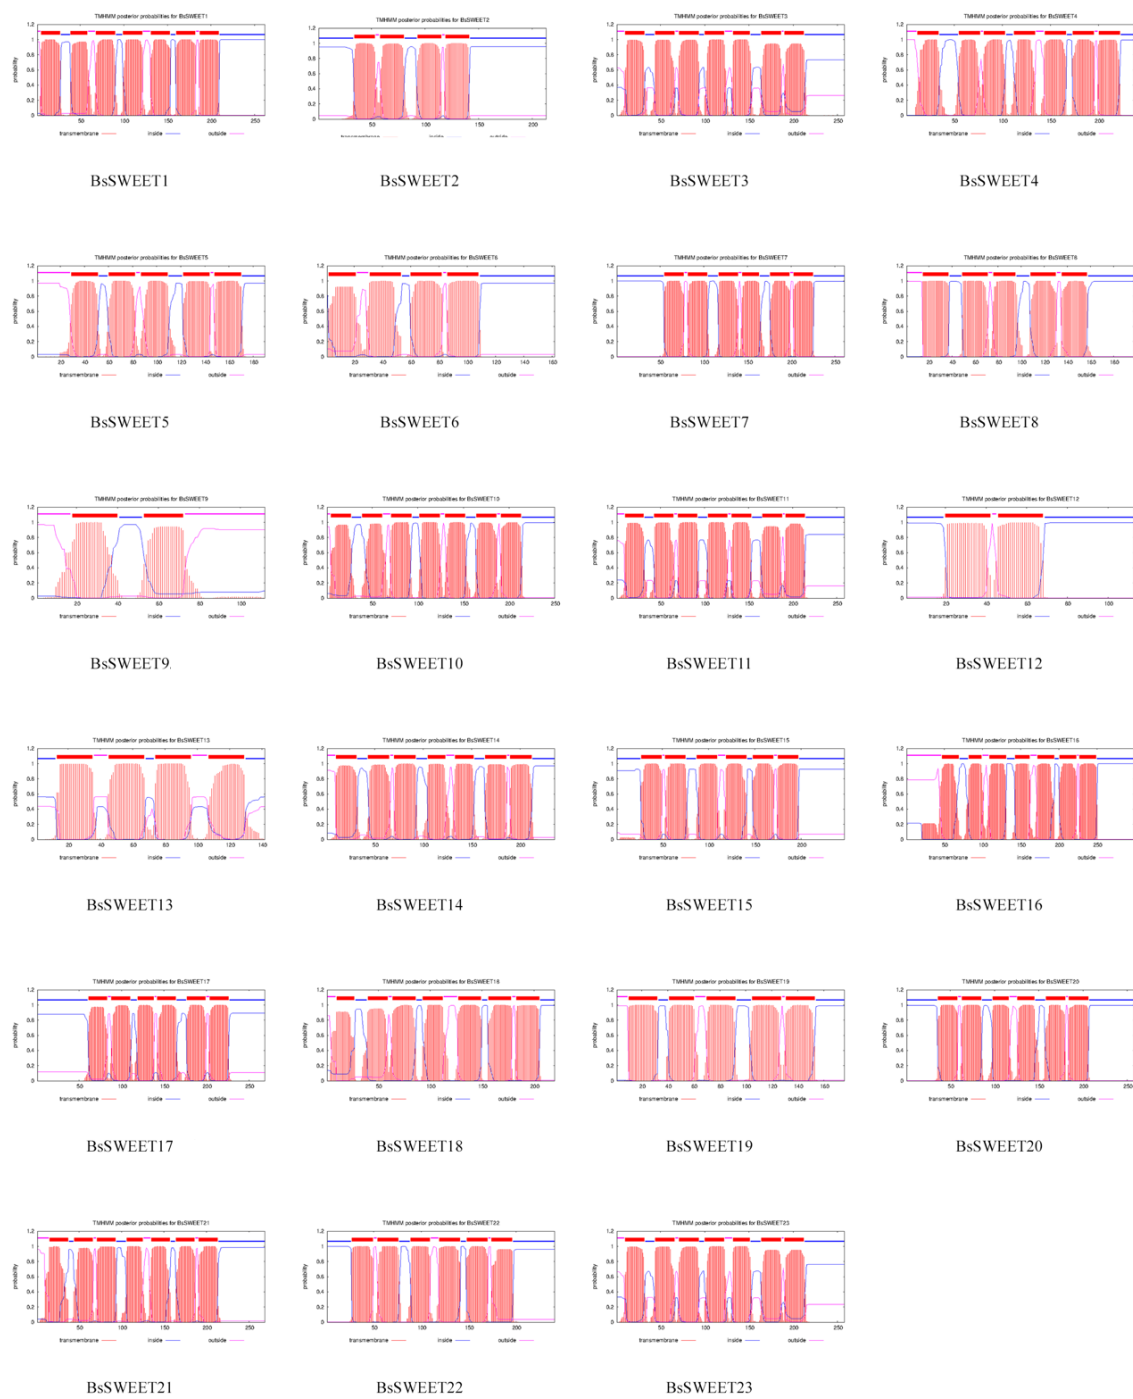

**Figure S3.** Prediction of the transmembrane structural domain of BsSWEET proteins.

**Table S2.** Prediction of the secondary structure of BsSWEET proteins.

|           | Alpha helix | Beta turn | Random coil |
|-----------|-------------|-----------|-------------|
| BsSWEET1  | 42.37%      | 3.82%     | 33.21%      |
| BsSWEET2  | 41.78%      | 5.63%     | 31.92%      |
| BsSWEET3  | 37.98%      | 3.88%     | 36.43%      |
| BsSWEET4  | 44.73%      | 2.95%     | 31.22%      |
| BsSWEET5  | 40.53%      | 7.89%     | 23.16%      |
| BsSWEET6  | 37.04%      | 1.23%     | 40.12%      |
| BsSWEET7  | 39.46%      | 2.30%     | 38.31%      |
| BsSWEET8  | 42.93%      | 2.02%     | 30.81%      |
| BsSWEET9  | 41.07%      | 3.57%     | 3.57%       |
| BsSWEET10 | 38.40%      | 4.80%     | 36.40%      |
| BsSWEET11 | 39.38%      | 3.47%     | 36.29%      |
| BsSWEET12 | 37.17%      | 1.77%     | 36.28%      |
| BsSWEET13 | 39.44%      | 4.23%     | 26.76%      |
| BsSWEET14 | 44.92%      | 3.39%     | 28.81%      |
| BsSWEET15 | 39.68%      | 3.24%     | 36.44%      |
| BsSWEET16 | 40.80%      | 3.34%     | 35.12%      |
| BsSWEET17 | 38.29%      | 5.58%     | 34.20%      |
| BsSWEET18 | 39.55%      | 2.73%     | 33.18%      |
| BsSWEET19 | 40.91%      | 4.55%     | 28.98%      |
| BsSWEET20 | 38.76%      | 3.88%     | 37.21%      |
| BsSWEET21 | 46.84%      | 1.49%     | 34.20%      |
| BsSWEET22 | 45.23%      | 3.32%     | 31.12%      |
| BsSWEET23 | 42.64%      | 3.10%     | 33.33%      |

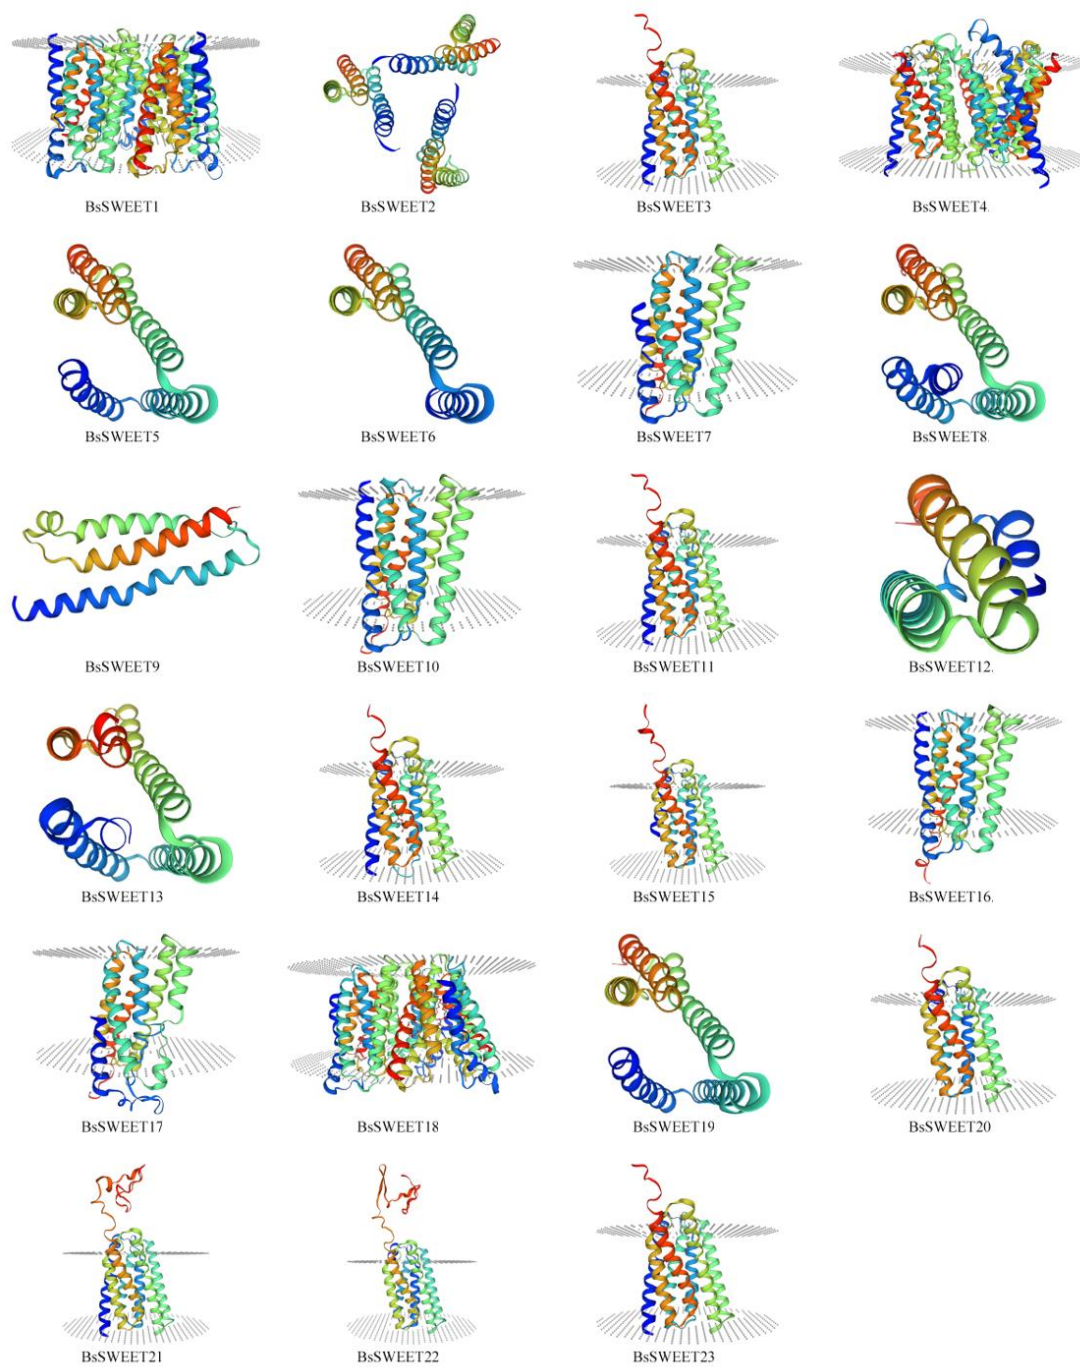

**Figure S4.** Prediction of the tertiary structure of BsSWEET proteins.

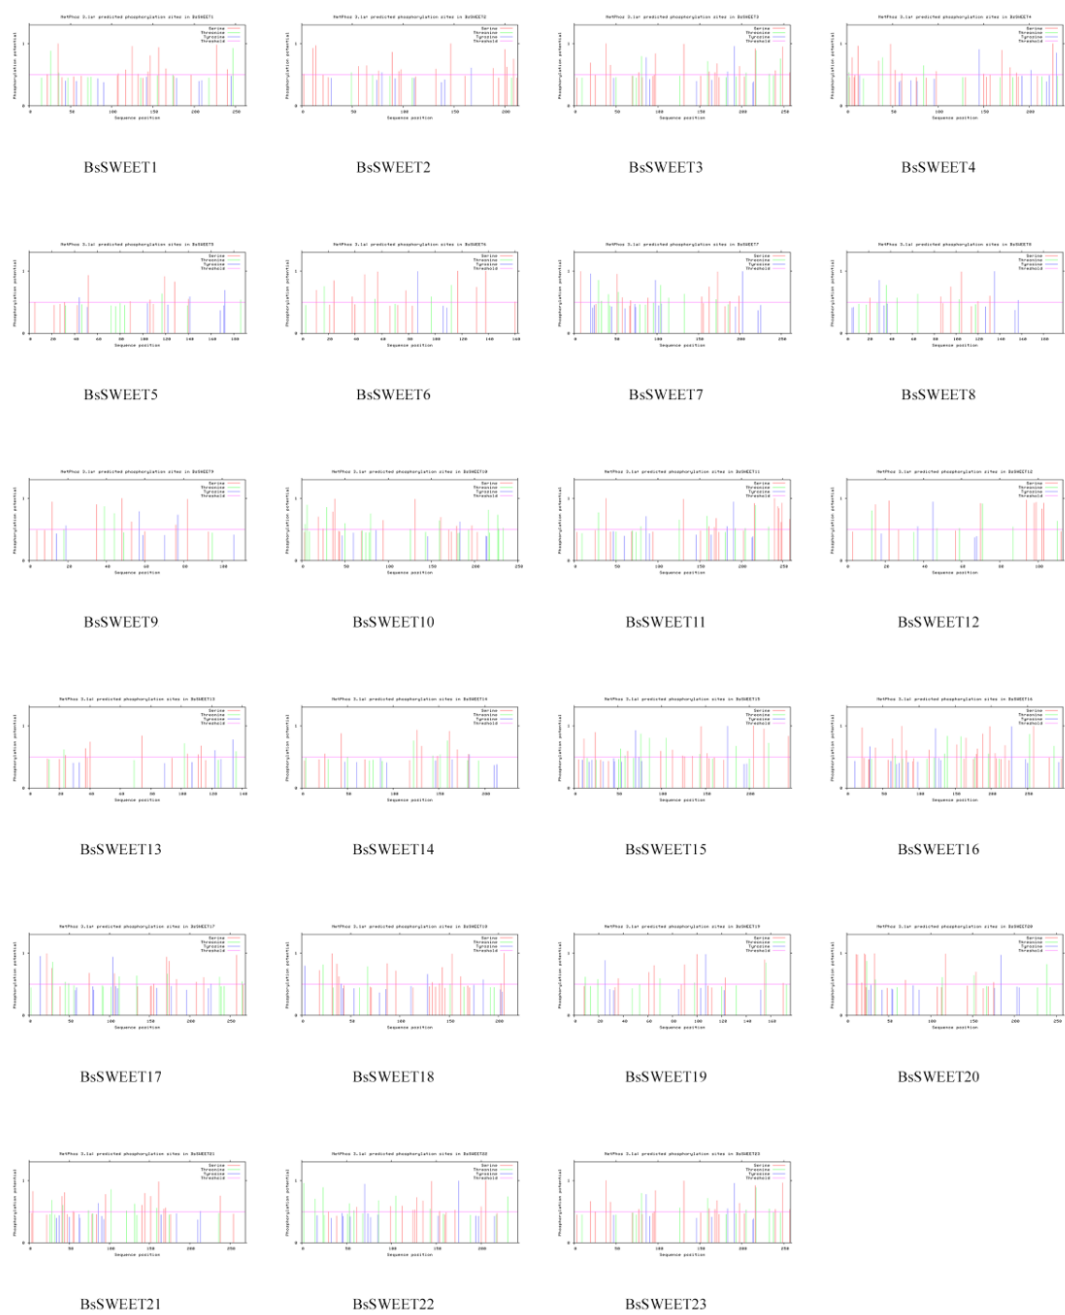

**Figure S5.** Prediction of phosphorylation sites of BsSWEET proteins.

**Table S3.** Prediction of phosphorylation sites of BsSWEET proteins.

|           | Ser site | Thr site | Tyr site |
|-----------|----------|----------|----------|
| BsSWEET1  | 12       | 4        | 0        |
| BsSWEET2  | 16       | 2        | 2        |
| BsSWEET3  | 15       | 6        | 3        |
| BsSWEET4  | 14       | 3        | 3        |
| BsSWEET5  | 8        | 2        | 3        |
| BsSWEET6  | 10       | 4        | 1        |
| BsSWEET7  | 10       | 8        | 3        |
| BsSWEET8  | 6        | 4        | 3        |
| BsSWEET9  | 6        | 3        | 3        |
| BsSWEET10 | 10       | 12       | 1        |
| BsSWEET11 | 12       | 8        | 3        |
| BsSWEET12 | 8        | 6        | 2        |
| BsSWEET13 | 7        | 3        | 2        |
| BsSWEET14 | 8        | 4        | 1        |
| BsSWEET15 | 13       | 8        | 3        |
| BsSWEET16 | 15       | 8        | 3        |
| BsSWEET17 | 12       | 8        | 3        |
| BsSWEET18 | 13       | 3        | 4        |
| BsSWEET19 | 9        | 7        | 2        |
| BsSWEET20 | 10       | 5        | 1        |
| BsSWEET21 | 12       | 7        | 2        |
| BsSWEET22 | 13       | 9        | 2        |
| BsSWEET23 | 15       | 6        | 3        |



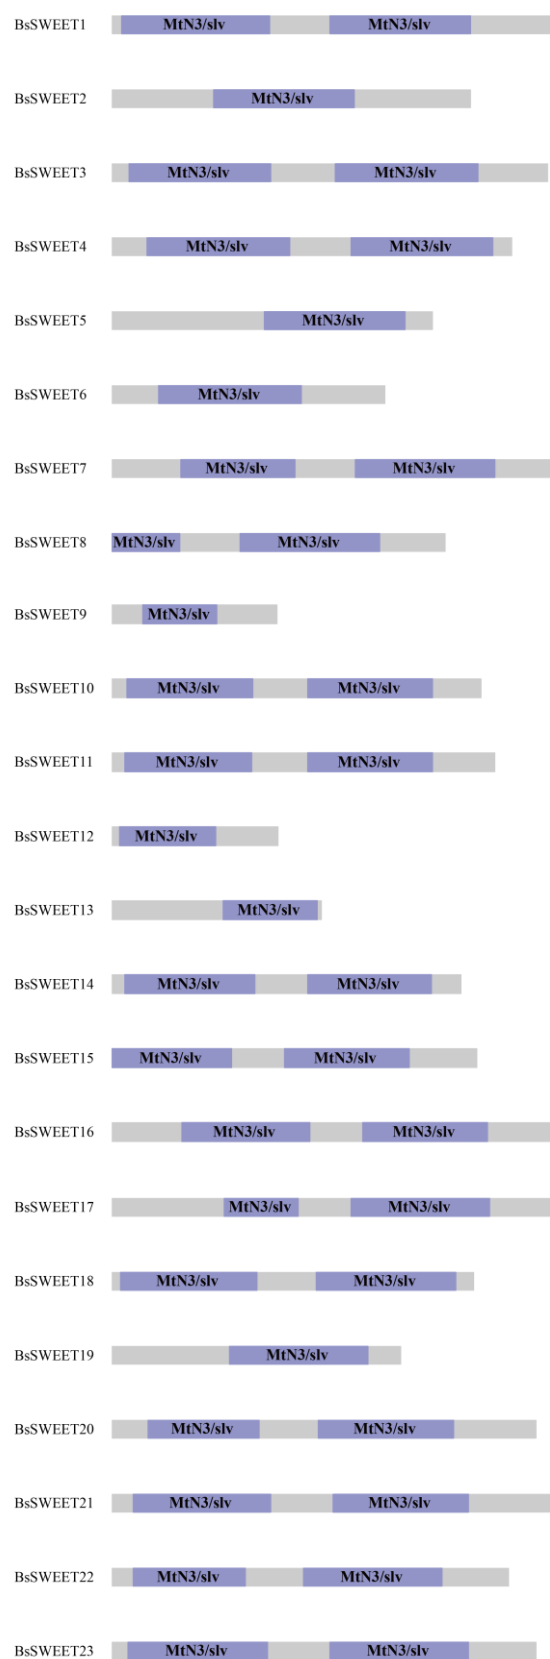

**Figure S6.** The SWEET conserved domains in *B. striata*.

**Table S4.** The sequence of the conserved motifs in *B. striata*.

|         |                                                   | MEME sites |
|---------|---------------------------------------------------|------------|
| motif 1 | HSRRLIVGIJCVIFSVMYAAPLSIMRLVIRTKSVEFMPF           | 21         |
| motif 2 | FLFLNGVCWTIYGLJSKDIYITJPNGLGLLFGIAQLLLYAIYKKSKKPQ | 21         |
| motif 3 | PLPTFYRIYKKKSTEQFSSVPYVVALLNCMLWIYYGLPKVH         | 15         |
| motif 4 | LVLTINSFGTVIETIYIIJYLIYAPKKKR                     | 19         |
| motif 5 | EKEMKGEVGLTDVVIDDSVKPPPTVASHK                     | 4          |
| motif 6 | DIIRFAVGIVGNVISLGLFLS                             | 10         |
| motif 7 | FTAKIILLNNGIFGAIVLCT                              | 8          |
| motif 8 | FLGELAFVAIVVVVVLVCFHT                             | 7          |

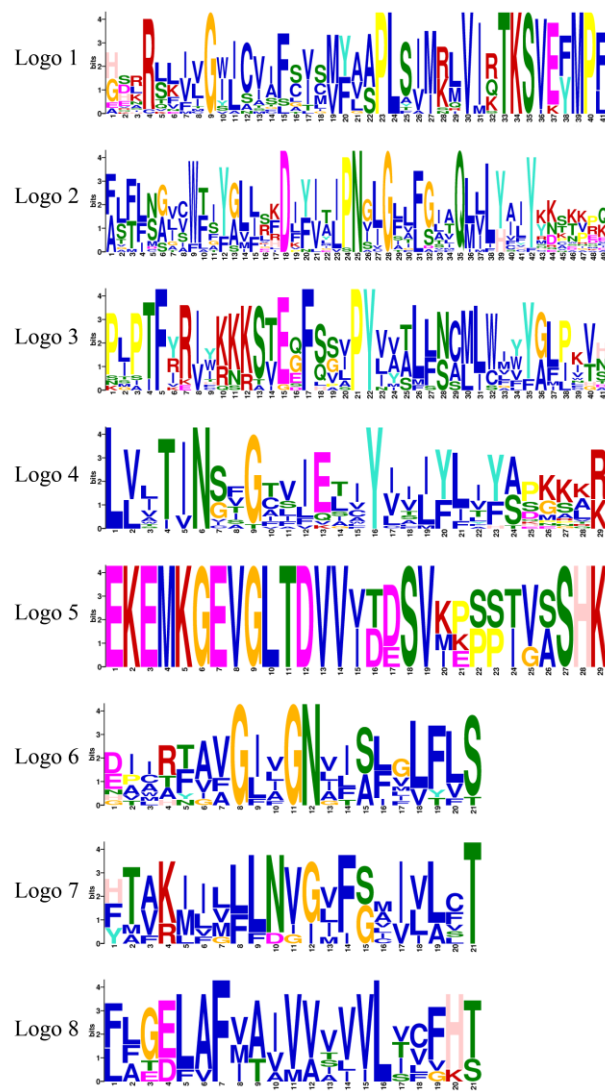

**Figure S7.** The different conserved motifs in *B. striata*. The letter size of the amino acid represents the frequency of the corresponding nucleotide.

**Table S5.** Detailed information on *cis*-acting elements of the promoter region in *B. striata*.

| <i>cis</i> -acting element | sequence   | response                          |
|----------------------------|------------|-----------------------------------|
| G-box                      | GCCACGTGGA | Sugar suppress                    |
| G-box                      | CACGTG     | Sugar suppress                    |
| I-box                      | AGATAAGG   | Sugar suppress                    |
| I-box                      | TGATAATGT  | Sugar suppress                    |
| I-box                      | AGATAAGG   | Sugar suppress                    |
| W box                      | TTGACC     | Sugar induce                      |
| ABRE                       | ACGTG      | abscisic acid responsiveness      |
| ACE                        | CTAACGTATT | light responsiveness              |
| CAT-box                    | GCCACT     | related to meristem expression    |
| CGTCA-motif                | CGTCA      | MeJA responsiveness               |
| GARE-motif                 | TCTGTTG    | gibberellin responsiveness        |
| LTR                        | CCGAAA     | low-temperature responsiveness    |
| P-box                      | CCTTTTG    | gibberellin responsiveness        |
| TCA-element                | CCATCTTTTT | salicylic acid responsiveness     |
| TC-rich repeats            | ATTCTCTAAC | defense and stress responsiveness |
| TCT-motif                  | TCTTAC     | light responsiveness              |

**Table S6.** Parameter estimates and log-likelihood scores under models of  $\omega$ -ratios among sites.

| Model                   | parameter estimates                                                                                           | Likelihood scores | Positive selected sites |
|-------------------------|---------------------------------------------------------------------------------------------------------------|-------------------|-------------------------|
| M0:One-ratio            | $\omega_0=0.10954$                                                                                            | -207.827844       | Not Allowed             |
| M1a:Nearly neutral      | $\omega_0=0.02710$ , $\omega_1=1$ , ( $p_0=0.82381$ ,<br>$p_1=0.17619$ )                                      | -197.067484       | Not Allowed             |
| M2a:Positive selection  | $\omega_0=0.02710$ , $\omega_1=1$ , $\omega_2=1$ , ( $p_0=0.82381$ ,<br>$p_1=0.04344$ , $p_2=0.13275$ )       | -197.067485       | □                       |
| M3:discrete             | $\omega_0=0.02710$ , $\omega_1=0.02098$ , $\omega_2=0.52812$ ,<br>( $p_0=0$ , $p_1=0.82072$ , $p_2=0.17928$ ) | -196.359044       | □                       |
| M7: $\beta$             | $p=0.48953$ , $q=1.41328$                                                                                     | -195.873654       | Not Allowed             |
| M8: $\beta+\omega s>1$  | $p_0=0.84124$ , $p_1=0.15876$ , $p=1.02856$ ,<br>$q=11.54106$ , $\omega=1$                                    | -196.511480       |                         |
| M8a: $\beta+\omega s=1$ | $p_0=0.83485$ , $p_1=0.16515$ , $p=1.45584$ ,<br>$q=122.48221$ , $\omega=1$                                   | -196.877938       | Not Allowed             |

**Table S7.** List of q-PCR validation primers used in the present study.

| Gene ID          | Forward primer (5' - 3')    | Reverse primer (5' - 3')  |
|------------------|-----------------------------|---------------------------|
| <i>BsSWEET1</i>  | ACGGGTTGCTTGGCCATGAT        | CGCCCATCTCAACGGCTTCT      |
| <i>BsSWEET2</i>  | TGCAGGGATTTGGACAATCTACTCTGT | CTGAGCTGAGCCTTCTTCTTCTGC  |
| <i>BsSWEET3</i>  | GGGTCAAAGCGGGTTAAGGCA       | GGAGCGACGATCGTGTGTGT      |
| <i>BsSWEET4</i>  | CGTCCGGTCCCTCTTTCTAT        | AGCAAACAGGTTTCCTGCAA      |
| <i>BsSWEET5</i>  | GGTCACTTTGGTGCTCACGGT       | AGGCAGCGAAGGAAAGCCAA      |
| <i>BsSWEET6</i>  | AGCGCAGTGGTTTGGTTCTCC       | TGAAGCGCACCAAATGTGAATCCT  |
| <i>BsSWEET7</i>  | GCGTTGCGTTCTCTGTGAGC        | ACAGTACACCGTAGCCTAGCCA    |
| <i>BsSWEET8</i>  | CGTTTGGCTAGGCTACGGTGT       | TCAGCAAGCTTCGGATTGGCA     |
| <i>BsSWEET9</i>  | TTTCGGCCGGCCTTTCTTTCT       | GGCGACACGAAGAGTACGATGG    |
| <i>BsSWEET10</i> | TCCACTCGCAAGGCAAGCAA        | ACAAGCCCAACAGCAGCGAT      |
| <i>BsSWEET11</i> | TGTGCTGGGACAGCCATTGAG       | AGAAGAGCAGCATGGCCTTGAG    |
| <i>BsSWEET12</i> | GGTTTCTGCCGATGCAATGA        | AGGCCAAGACCATTGGGAAT      |
| <i>BsSWEET13</i> | TGGTGTTTGGGCTACCCGTTG       | GCCTTAACCCGCTTCGACTCA     |
| <i>BsSWEET14</i> | GCCCGAAACGTCGTTGGGAT        | CGGGATTGGCGAGAACTGCT      |
| <i>BsSWEET15</i> | TCTTCCAAGGCTCTAATCGCCTCA    | CACTCTTGGTGCGGATGACCA     |
| <i>BsSWEET16</i> | CTGAAAGCTTGGCAGAGGAGCA      | GACAACCTGTGGCTTGGTCACT    |
| <i>BsSWEET17</i> | AAGCAGCTACACCGCAAGCA        | GATGCGCCGAGGAGAGCATT      |
| <i>BsSWEET18</i> | AGAAGGCAAAGCTCGGCAGAAT      | TTGCAAGAGAAAGGTGGAAAGGCA  |
| <i>BsSWEET19</i> | ACCAAACAGCACACTTGTGGTCA     | GGCGAAGTCGGTGAAGAGCA      |
| <i>BsSWEET20</i> | GGGTTTCAGGCGGTGCCTTAT       | AACGCAGCCGATGGAGTTGAT     |
| <i>BsSWEET21</i> | GGTGCTTTGTCCAGTGCGA         | AGGCAGATTCAAGGACGCAAGTG   |
| <i>BsSWEET22</i> | TCAGTTAGTGTCTTCGCTGCTCCT    | TGCAAATCCAAGCACATTTGGGAGT |
| <i>BsSWEET23</i> | GGTCGAAGCGGGTTAAGGCA        | ATGCCGACGATGAGGGAACG      |
| <i>BsGAPDH</i>   | GCTAAAGACGCTGTCACTGAG       | GAGACCAGAACTTACCCTCG      |

**Table S8.** List of primers used in the present study.

| Gene ID           | Forward primer (5' - 3')              | Reverse primer (5' - 3')       |
|-------------------|---------------------------------------|--------------------------------|
| <i>BsSWEET 15</i> | GGGGTACCGGAAATATCATCTCATTCATGGTGTACCT | CGGGATCCCACCGGGCTCATCTCCTTC    |
| <i>BsSWEET 16</i> | GGGGTACCTTCCAATTACTTGAGTTAAACAAGTTTGG | CGGGATCCCACCTGCGCTTATCTCATTGTA |
